# Supplementary material
Source: Springer Nature journal article supplement (https://repositorio.tec.mx/bitstream/handle/11285/613679/12864_2006_958_MOESM2_ESM.pdf)

# Folate

# $\gamma$ -Glu tail

## Pterin

## pABA

## Glu

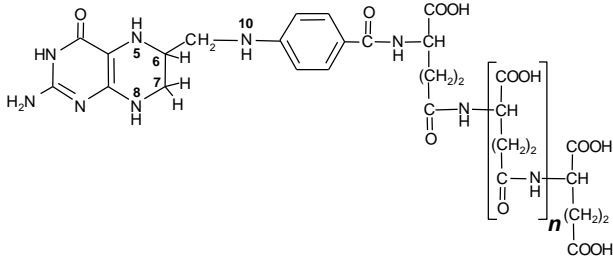

Supplement: MOESM2 [file 12864_2006_958_MOESM2_ESM.pdf]
